# Supplementary material for: Molecular outcomes, clinical consequences, and genetic diagnosis of Oculocutaneous Albinism in Pakistani population
Source: PubMed Central journal article supplement (PMC5339803; doi:10.1038/srep44185), 2017-03-07
Supplement: srep44185-s1.pdf [file srep44185-s1.pdf]

**Molecular outcomes, clinical consequences, and genetic diagnosis of  
Oculocutaneous Albinism in Pakistani population**

Mohsin Shahzad<sup>1,\*</sup>, Sairah Yousaf<sup>1,2,\*</sup>, Yar M. Waryah<sup>3</sup>, Hadia Gul<sup>4</sup>, Tasleem Kausar<sup>2</sup>,  
Nabeela Tariq<sup>2</sup>, Umair Mahmood<sup>1</sup>, University of Washington Center for Mendelian  
Genomics, Muhammad Ali<sup>5</sup>, Muzammil A. Khan<sup>4</sup>, Ali M. Waryah<sup>3</sup>, Rehan S. Shaikh<sup>2</sup>,  
Saima Riazuddin<sup>1</sup> & Zubair M. Ahmed<sup>1</sup>

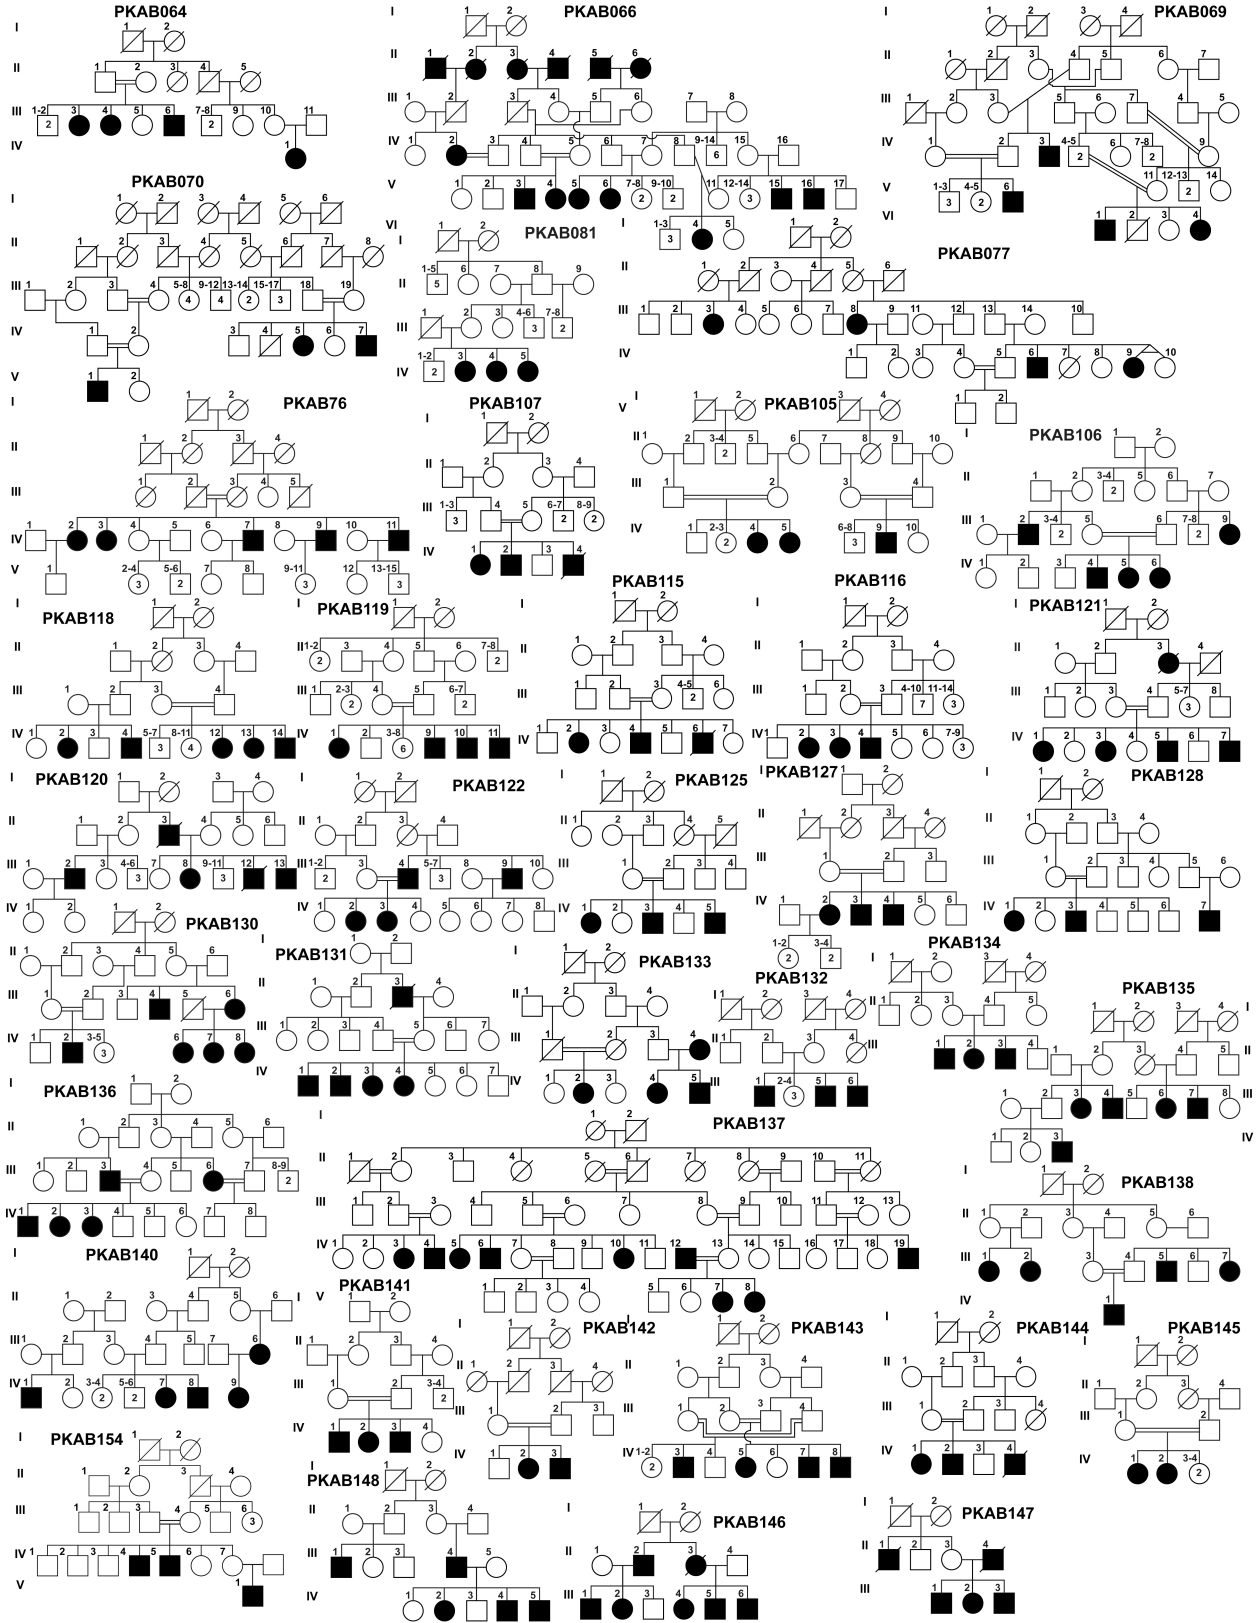

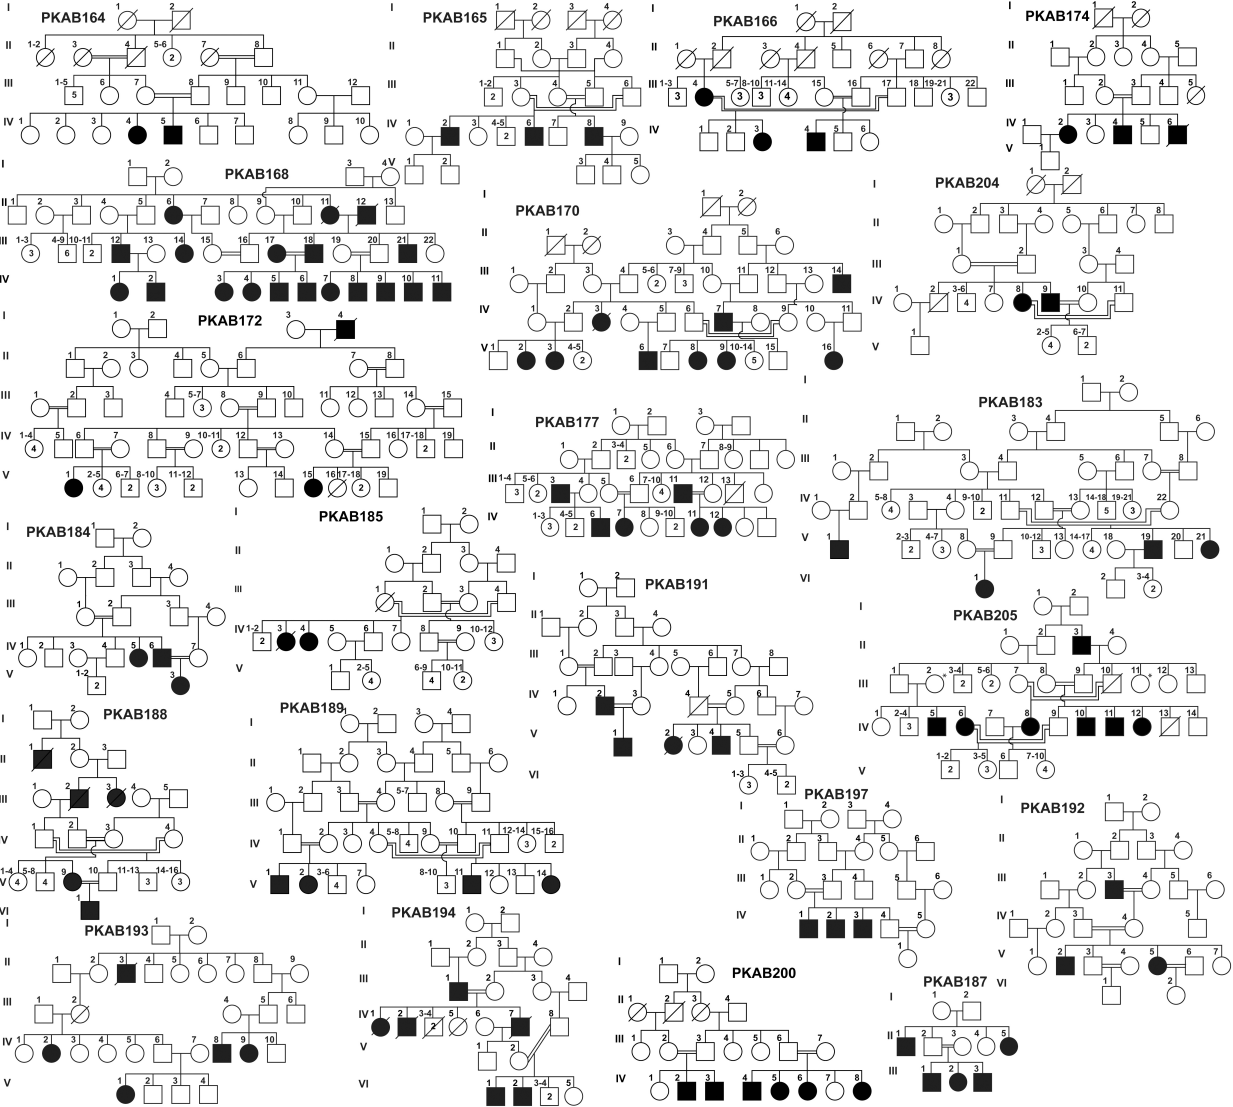

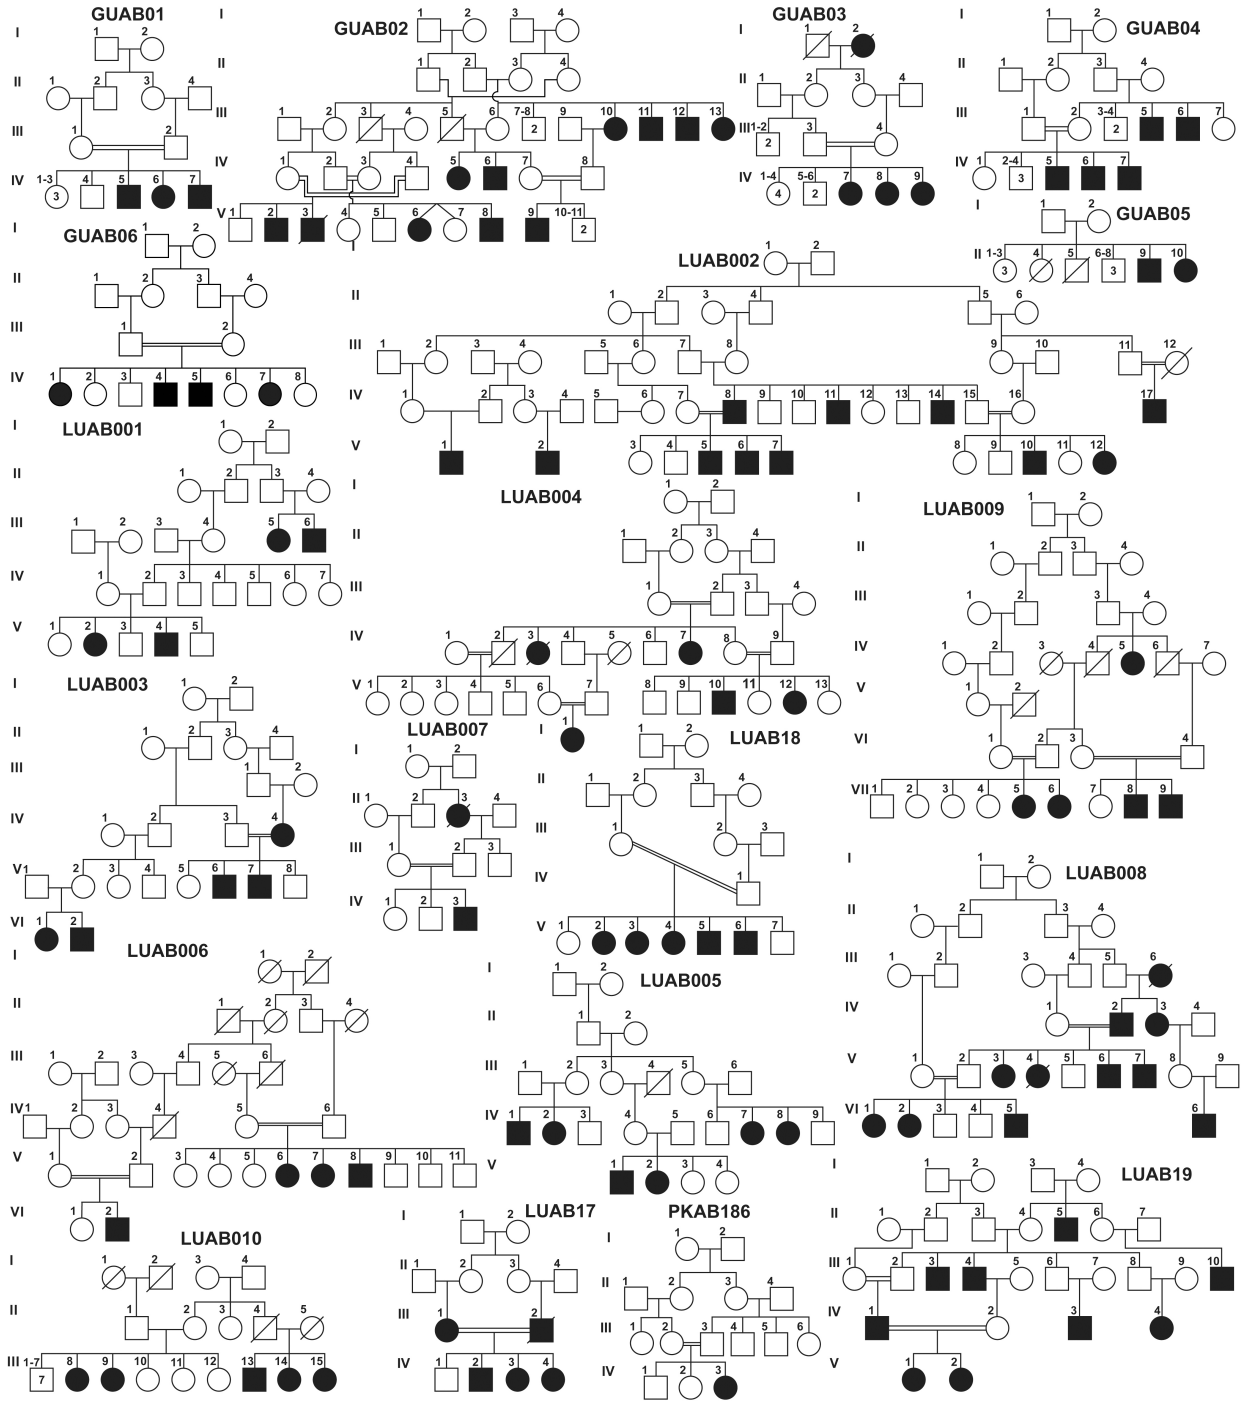

**Supplementary Figure S1: Pedigrees of 80 families co-segregating OCA and mutations in OCA1-4 genes.** Filled symbols represent individuals with nonsyndromic oculocutaneous albinism. Double line indicates consanguineous marriage.



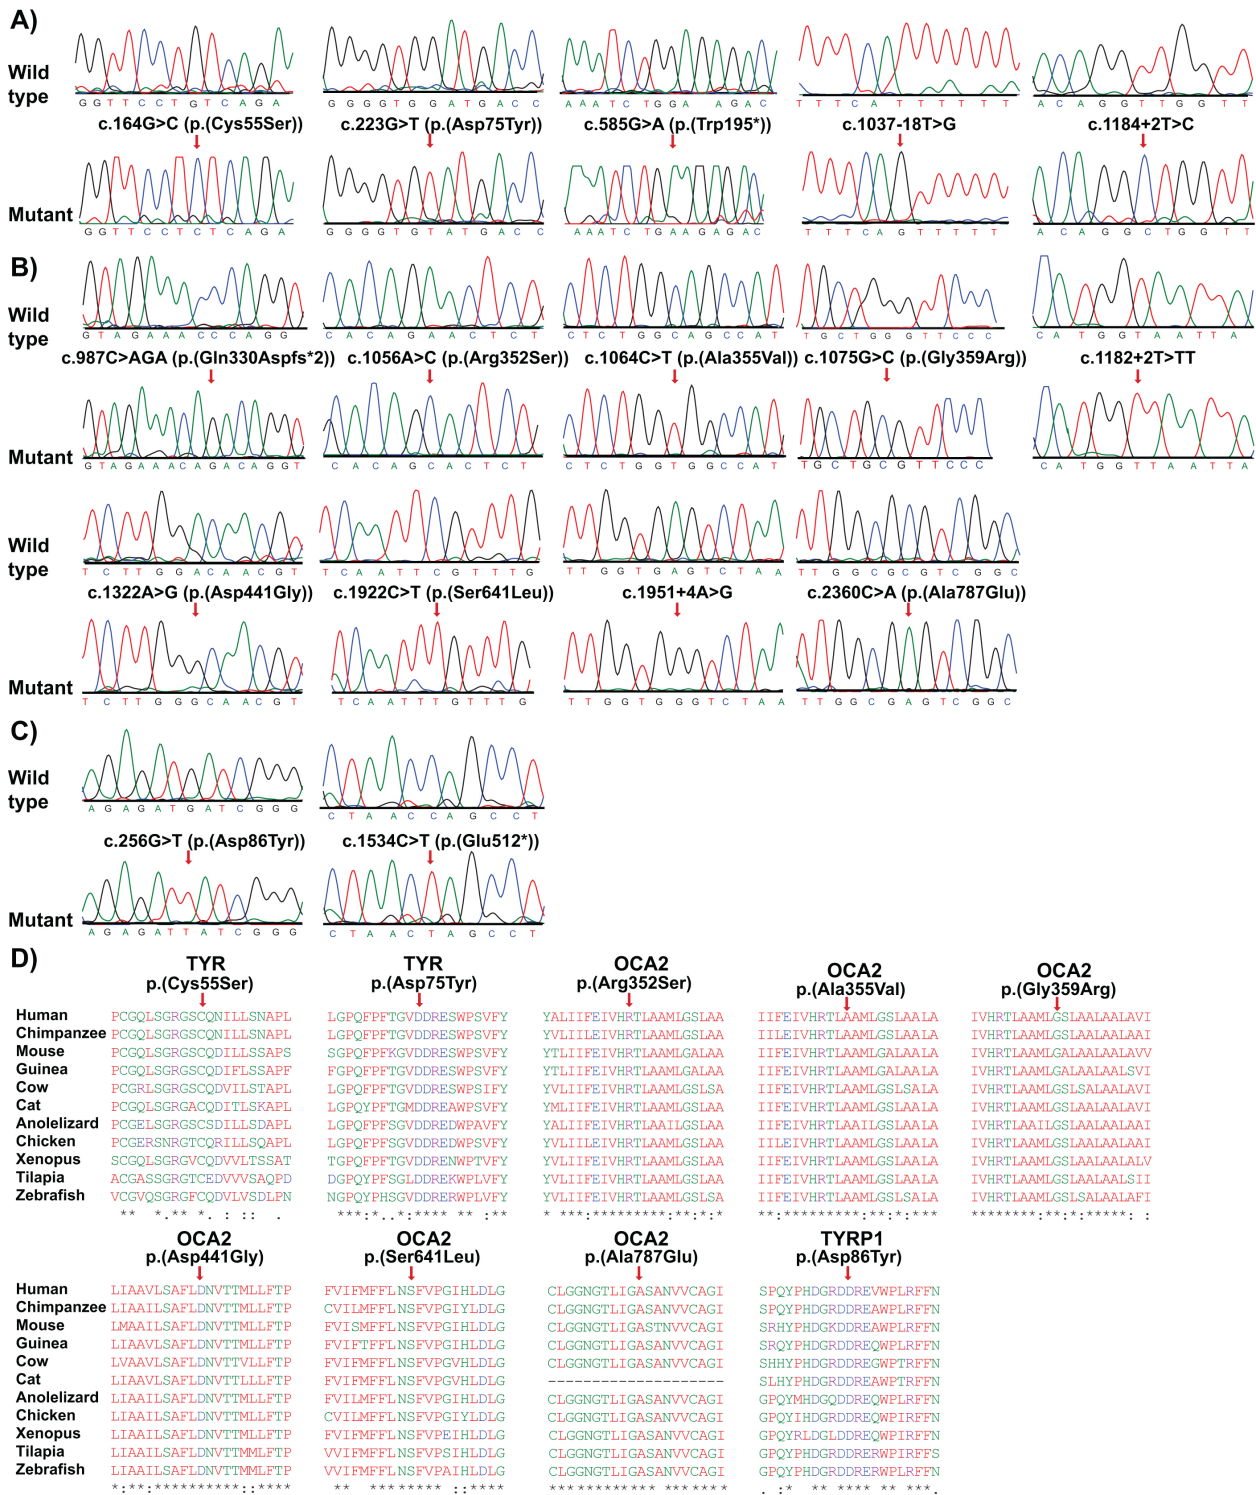

**Supplementary Figure S2: Novel OCA genes alleles and evolutionary conservation of encoded proteins. (A-C)** Nucleotide sequence chromatograms of exons of *TYR* (A), *OCA2* (B), and *TYRP1* (C) genes showing the wild type sequences and homozygosity for the mutation. **(D)** ClustalW alignments of *TYR*, *OCA2* and *TYRP1* proteins from various species revealed high conservation of amino acids mutated in our cohort.

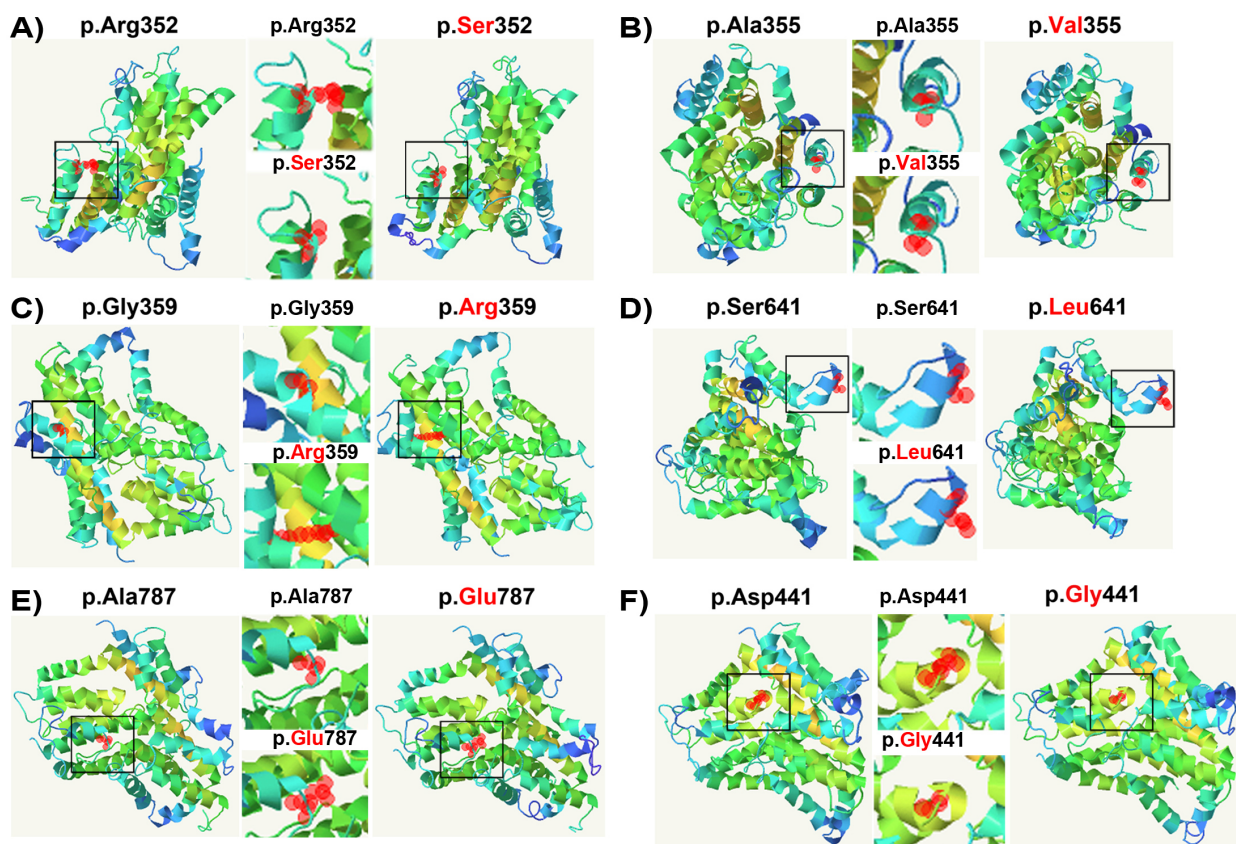

**Supplementary Figure S3: Molecular modeling of OCA2 protein.** Wild type and mutant residues are shown in red. Boxed regions are magnified to show the impact of the mutant alleles as compare to wild type residues on the structure of encoded protein.

(A) The p.(Arg352Ser) found in LUAB02, is predicted to replace the positively charged arginine with a small neutral serine, which not only will alter the interactional network of protein with other residues but leads to protein misfolding due to the change in hydrophobicity and subsequent loss of hydrogen bonds. (B) The p.Ala355 residue is part of transmembrane domain and replacing it with p.(Arg355Val) variant found in family PKAB136, which is known to be larger in size than alanine might lead to bumps and could affect the contacts with the lipid-membrane. (C) The p.(Gly359Arg) variant found in GUAB02 family, was predicted to cause the repulsion of ligands or other residues with the same charge and due to unusual torsion angles of arginine could also affects the contact with the lipid membrane. Only glycine is flexible enough to make these torsion angles, mutation into another residue will force the local backbone into an incorrect conformation and will disturb the local structure. (D) The p.(Ser641Leu) variant might cost the interaction with other proteins because of its bigger size. Leucine is more hydrophobic in nature, could result in loss of hydrogen bonds, which is predicted to disrupt the protein topology as well. (E) The p.(Ala787Glu) variant introduces a negative charge that can cause repulsion of ligands of same charge. Alanine is more hydrophobic than glutamic acid so the hydrophobic interactions, either in the core of the protein or on the surface, are predicted to be lost. (F) Finally, the molecular modeling of p.(Asp441Gly) variant found in LUAB06 suggested that mutant residue glycine is more hydrophobic, which could affect protein secondary structure due to the loss of hydrogen bonds and small size.

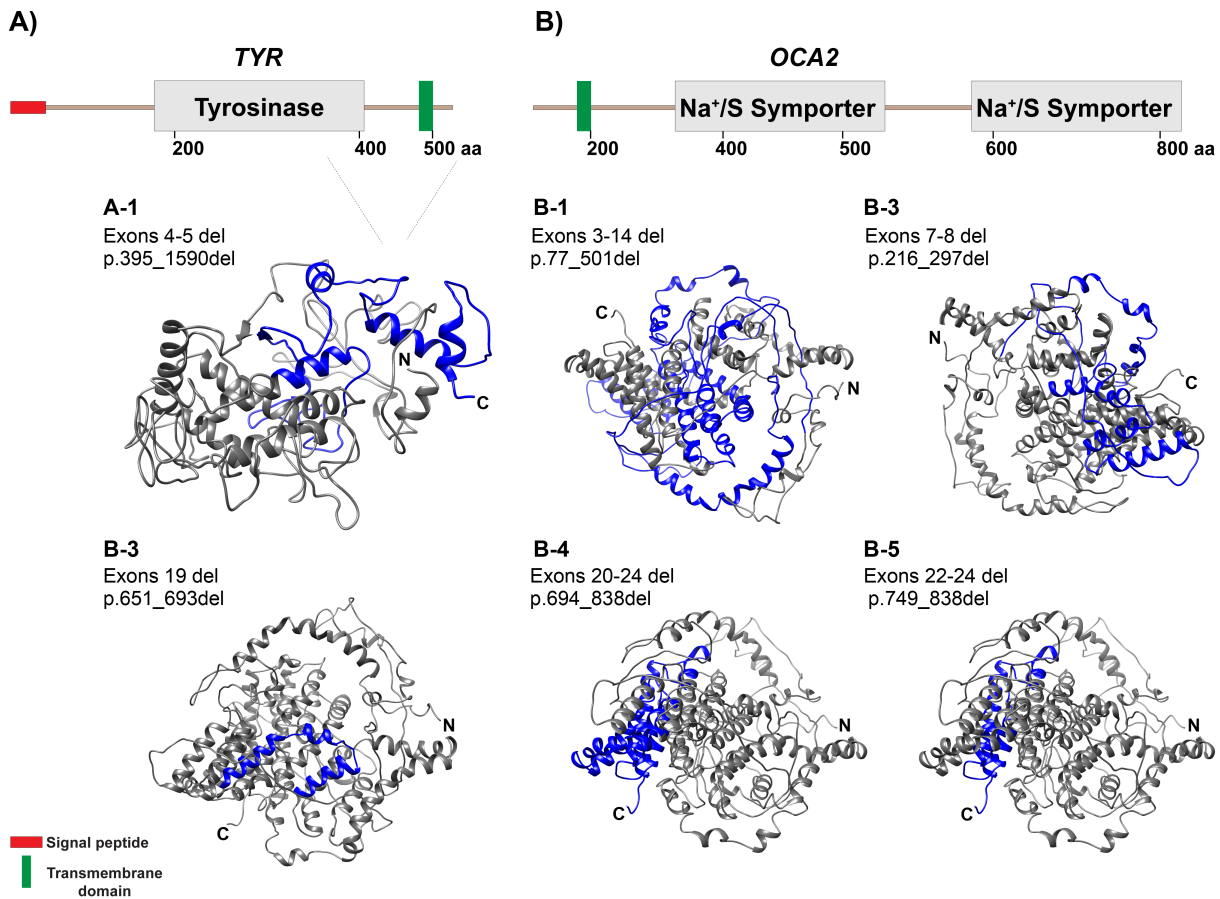

**Supplementary Figure S4: Structural representation of gross deletions in TYR and OCA2 proteins.** (A) TYR protein domain representation and its structural coverage. (B) The OCA2 protein domains and its predicted structure. Deleted residues are indicated in blue and wild type structure is presented in dark grey shade. S is for Sulphur in Na<sup>+</sup>/S symporter domain.

**TableS1. Pathogenic variants in OCA1-4 genes identified in Pakistani origins proband/families**

| Families                                                                                                                 | Mutation            | Effect on protein    | Allele frequency |             |           |            | Polyphen-2        | Mutation Taster | SIFT        | Reference  |
|--------------------------------------------------------------------------------------------------------------------------|---------------------|----------------------|------------------|-------------|-----------|------------|-------------------|-----------------|-------------|------------|
|                                                                                                                          |                     |                      | PK               | 1000 genome | NHLBI6500 | ExAC       |                   |                 |             |            |
| <b>TYR</b>                                                                                                               |                     |                      |                  |             |           |            |                   |                 |             |            |
| PKAB74                                                                                                                   | c.62C>T             | p.(Pro21Leu)         | -                | 0           | 0         | 0          | Probably damaging | Disease causing | Damaging    | 1          |
| PKAB01, PKAB65                                                                                                           | c.103T>C            | p.(Cys35Arg)         | -                | 0           | 0         | 0          | Probably damaging | Disease causing | Damaging    | 1          |
| Pakistani family                                                                                                         | c.132T>A            | p.(Ser44Arg)         | -                | 0           | 0         | 0          |                   |                 |             | 2          |
| PKAB115                                                                                                                  | c.164G>C            | p.(Cys55Ser)         | 0/180            | 0           | 0         | 0.0000082  | Probably damaging | Disease causing | Damaging    | This study |
| PKAB174                                                                                                                  | c.223G>T            | p.(Asp75Tyr)         | 0/176            | 0           | 0         | 0          | Probably damaging | Disease causing | Damaging    | This study |
| Pakistani family                                                                                                         | c.230G>A            | p.(Arg77Gln)         |                  | 0.0004      | 0.0002    | 0.00009925 | Probably damaging | Disease causing | Deleterious | 2          |
| Pakistani child                                                                                                          | c.344_345delGA      | p.(Arg115Thrfs*52)   | -                | 0           | 0         | 0          | -                 | -               | -           | 3          |
| Pakistani family                                                                                                         | c.575C>A            | p.(Ser192Tyr)        |                  | 0.1234      | 0.2748    | 0.251800   | Probably damaging | Polymorphism    | Deleterious | 2          |
| PKAB200                                                                                                                  | c.585G>A            | p.(Trp195*)          | 0/186            | 0           | 0.000153  | 0.0000082  | -                 | -               | -           | This study |
| Pakistani family                                                                                                         | c.593T>C            | p.(Ile198Thr)        | -                | 0           | 0         | 0.0000082  | Probably damaging | Disease causing | Damaging    | 4          |
| PKAB66, PKAB76, PKAB141, PKAB142, PKAB147                                                                                | c.649C>T            | p.(Arg217Trp)        | -                | 0           | 0.000153  | 0.0001979  | Probably damaging | Polymorphism    | Tolerated   | 5          |
| Pakistani family                                                                                                         | c.715C>T            | p.(Arg239Trp)        | -                | 0           | 0         | 0.00004131 | Probably damaging | Disease causing | Deleterious | 2          |
| Family1, PKAB57, PKAB118, PKAB120, PKAB143, PKAB145, PKAB165, PKAB185, PKAB189, PKAB194, LUAB05, LUAB08, LUAB19, PKAB204 | c.832C>T            | p.(Arg278*)          | -                | 0           | 0         | 0.00019    | -                 | -               | -           | 6          |
| PKAB128, PKAB154                                                                                                         | c.896G>A            | p.(Arg299His)        | -                | 0           | 0         | 0.0000742  | Probably damaging | Disease causing | Damaging    | 5          |
| PKAB138, Family1                                                                                                         | c.943-948delTCAGCT  | p.(315-316delSerAla) | -                | 0           | 0         | 0          | -                 | -               | -           | 7          |
| Pakistani proband                                                                                                        | c.982G>C            | p.(Glu328Gln)        | -                | 0           | 0         | 0          | Probably damaging | Disease causing | Damaging    | 6          |
| PKAB105, PKAB183, PKAB186, PKAB188                                                                                       | c.1037-7T>A         | Splicing error       | -                | 0           | 0.001538  | 0          | -                 | -               | -           | 8          |
| LUAB01                                                                                                                   | c.1037-18T>G        | Splicing error       | 0/176            | 0           | 0         | 0.0000167  | -                 | -               | -           | This study |
| PKAB197                                                                                                                  | c.1037G>A           | p.(Gly346Glu)        | -                | 0           | 0         | 0.0000082  | Probably damaging | Disease causing | Damaging    | 3          |
| Pakistani proband                                                                                                        | c.1126C>T           | p.(Gln376*)          | -                | 0           | 0         | 0.0000082  | -                 | -               | -           | 6          |
| PKAB119                                                                                                                  | c.1147G>A           | p.(Asp383Asn)        | -                | 0           | 0         | 0.000165   | Probably damaging | Disease causing | Damaging    | 9          |
| PKAB130                                                                                                                  | c.1184+2T>C         | Splicing error       | 0/178            | 0           | 0         | 0.0000082  | -                 | -               | -           | This study |
| PKAB193                                                                                                                  | c.1204C>T           | p.(Arg402*)          | -                | 0           | 0         | 0.00004984 | -                 | -               | -           | 10         |
| PKAB153                                                                                                                  | c.1217C>T           | p.(Pro406Leu)        |                  | 0.002       | 0.00362   | 0          | Probably damaging | Disease causing | Damaging    | 11         |
| PKB103                                                                                                                   | c.1231T>C           | p.(Tyr411His)        | -                | 0           | 0         | 0          | Probably damaging | Disease causing | Damaging    | 1          |
| PKAB64, PKAB168                                                                                                          | Exons 4-5 deletion  | Frame shift          | 0/180            | 0           | 0         | 0          | -                 | -               | -           | This study |
| Family10, Family 11, PKAB81, PKAB106, PKAB107, PKAB140, PKAB184, PKAB191, LUAB03, LUAB19, GUAB01                         | c.1255G>A           | p.Gly419Arg)         | -                | 0           | 0         | 0.00003312 | Probably damaging | Disease causing | Damaging    | 12         |
| Pakistani proband                                                                                                        | c.1291C>A           | p.(Pro431Thr)        | -                | 0           | 0.000153  | 0          | Probably damaging | Disease causing | Damaging    | 10         |
| Pakistani proband                                                                                                        | c.1292C>T           | p.(Pro431Leu)        | -                | 0           | 0         | 0          | Probably damaging | Disease causing | Damaging    | 6          |
| Pakistani proband                                                                                                        | c.1357C>T           | p.(Gln453*)          | -                | 0           | 0         | 0          | -                 | -               | -           | 13         |
| <b>OCA2</b>                                                                                                              |                     |                      |                  |             |           |            |                   |                 |             |            |
| PKAB70                                                                                                                   | Exons 3-14 deletion | Frame shift          | 0/176            | 0           | 0         | 0          | -                 | -               | -           | This study |
| PKAB69, PKAB77                                                                                                           | Exons 7-8 deletion  | Frame shift          | 0/180            | 0           | 0         | 0          | -                 | -               | -           | This study |
| LUAB04                                                                                                                   | c.987C>AGA          | p.(Gln330Aspfs*2)    | 0/184            | 0           | 0         | 0          | -                 | -               | -           | This study |
| PKAB60, PKAB68, PKAB79, PKAB127, PKAB132, PKAB133, PKAB134, PKAB135, PKAB151, PKAB152, PKAB177, LUAB07, GUAB03           | c.1045-15T>G        | Splicing error       | -                | 0           | 0         | 0.00004136 | -                 | -               | -           | 1          |
| LUAB02                                                                                                                   | c.1056A>C           | p.(Arg352Ser)        | 0/182            | 0           | 0         | 0          | Probably damaging | Disease causing | Damaging    | This study |
| PKAB136                                                                                                                  | c.1064C>T           | p.(Ala355Val)        | 0/184            | 0.001       | 0         | 0.0002892  | Probably damaging | Disease causing | Tolerated   | This study |
| GUAB02                                                                                                                   | c.1075 G>C          | p.(Gly359Arg)        | 0/176            | 0           | 0         | 0          | Probably damaging | Disease causing | Damaging    | This study |
| PKAB144                                                                                                                  | c.1182+2T>TT        | Splicing error       | 0/180            | 0           | 0         | 0          | -                 | -               | -           | This study |
| PKAB148                                                                                                                  | c.1211C>T           | p.(Thr404Met)        | -                | 0           | 0.00769   | 0.00007417 | Probably damaging | Disease causing | Damaging    | 14         |

|                                                                                 |                      |                    |       |   |          |            |                   |                 |           |            |
|---------------------------------------------------------------------------------|----------------------|--------------------|-------|---|----------|------------|-------------------|-----------------|-----------|------------|
| LUAB06                                                                          | c.1322A>G            | p.(Asp441Gly)      | 0/178 | 0 | 0.000153 | 0.00001674 | Probably damaging | Disease causing | Tolerated | This study |
| PKAB52, PKAB54, PKAB55,<br>PKAB67, PKAB101, PKAB172,<br>PKAB187, GUAB06, LUAB17 | c.1456G>T            | p.(Asp486Tyr)      | -     | 0 | 0        | 0.00001674 | Probably damaging | Disease causing | Damaging  | 1          |
| PKAB63                                                                          | c.1580T>G            | p.(Leu527Arg)      | -     | 0 | 0        | 0.0000082  | Probably damaging | Disease causing | Damaging  | 1          |
| PKAB122                                                                         | c.1922C>T            | p.(Ser641Leu)      | 0/184 | 0 | 0        | 0          | Probably damaging | Disease causing | Damaging  | This study |
| LUAB10                                                                          | c.1951+4A>G          | Splicing error     | 0/182 | 0 | 0        | 0          | -                 | -               | -         | This study |
| PKAB137                                                                         | Exon 19 deletion     | Frame shift        | 0/174 | 0 | 0        | 0          | -                 | -               | -         | This study |
| Pakistani individuals                                                           | c.1960delG           | p.(Ala654Leufs*8)  | -     | 0 | 0        | 0          | -                 | -               | -         | 15         |
| PKAB121                                                                         | Exons 20-24 deletion | Frame shift        | 0/176 | 0 | 0        | 0          | -                 | -               | -         | This study |
| PKAB116                                                                         | Exons 21-24 deletion | Frame shift        | 0/180 | 0 | 0        | 0          | -                 | -               | -         | This study |
| PKAB58, PKAB72, LUAB09                                                          | c.2228C>T            | p.(Pro743Leu)      | -     | 0 | 0        | 0.00009078 | Probably damaging | Disease causing | Damaging  | 15         |
| PKAB170                                                                         | c.2360C>A            | p.(Ala787Glu)      | 0/182 | 0 | 0        | 0          | Probably damaging | Disease causing | Damaging  | This study |
| PKAB125                                                                         | c.2360C>T            | p.(Ala787Val)      | -     | 0 | 0        | 0.00002478 | Probably damaging | Disease causing | Damaging  | 16         |
| <b>TYRP1</b>                                                                    |                      |                    |       |   |          |            |                   |                 |           |            |
| PKAB166                                                                         | c.256G>T             | p.(Asp86Tyr)       | 0/180 | 0 | 0        | 0          | Probably damaging | Disease causing | Damaging  | This study |
| PKAB131                                                                         | c.647_668del         | P.(Glu216Glyfs*42) | -     | 0 | 0        | 0          | -                 | -               | -         | 17         |
| PKAB164, PKAB192,<br>PKAB205                                                    | c.1067G>A            | p.(Arg356Gln)      | -     | 0 | 0        | 0.00002550 | Probably damaging | Disease causing | Damaging  | 18         |
| Family 2                                                                        | c.1120C>T            | p.(Arg374* )       | -     | 0 | 0        | 0.00002492 |                   |                 |           | 19         |
| PKAB146                                                                         | c.1534C>T            | p.(Glu512*)        | 0/184 | 0 | 0        | 0.00001653 | -                 | -               | -         | This study |
| <b>SLC45A2</b>                                                                  |                      |                    |       |   |          |            |                   |                 |           |            |
| PKAB53                                                                          | c.251T>C             | p.(Leu84Pro)       | -     | 0 | 0        | 0          | Probably damaging | Disease causing | Damaging  | 17         |
| Pakistani family                                                                | c.755G>A             | p.(Gln272Lys)      | -     | 0 | 0        | 0          |                   |                 |           | 2          |
| PKAB59                                                                          | c.889-6T>G           | Splicing error     | -     | 0 | 0        | 0          | -                 | -               | -         | 17         |
| PKAB51, GUAB04, GUAB05                                                          | c.1532C>T            | p.(Ala511Val)      | -     | 0 | 0        | 0.0000082  | Probably damaging | Disease causing | Damaging  | 17         |

PK: Pakistani controls

**Table S2: Non-pathogenic variants observed in Pakistani OCA families**

| No.                        | Nucleotide change | Amino acid change | Location | dbSNP ID       | No. of families |
|----------------------------|-------------------|-------------------|----------|----------------|-----------------|
| <b>TYR (NM_000372)</b>     |                   |                   |          |                |                 |
| 1                          | c.575C>A          | p.(Ser192Tyr)     | Exonic   | rs1042602      | 16              |
| 2                          | c.1184+27C>T      | -                 | Intronic | rs147210895    | 01              |
| 3                          | c.1184+50G>A      | -                 | Intronic | rs3793975      | 08              |
| 4                          | c.1205G>A         | p.(Arg402Gln)     | Exonic   | rs147574809    | 11              |
| 5                          | c.1412C>G         | p.(Ala471Gly)     | Exonic   | rs3913544      | 17              |
| 6                          | c.1413G>A         | p.(Ala471Ala)     | Exonic   | -              | 16              |
| 7                          | c.1446G>C         | p.(Ala482Ala)     | Exonic   | rs138173955    | 18              |
| <b>OCA2 (NM_000275)</b>    |                   |                   |          |                |                 |
| 8                          | c.-13 C>G         | -                 | 5' UTR   | Novel variants | 01              |
| 9                          | c.987C>A          | p.(Thr329Thr)     | Exonic   | -              | 01              |
| 10                         | c.913G>A          | p.(Arg305Trp)     | Exonic   | rs1800401      | 20              |
| 11                         | c.954G>A          | p.(Met318Ile)     | Exonic   | rs529219961    | 01              |
| 12                         | c.1065G>A         | p.(Ala355Ala)     | Exonic   | rs1800404      | 23              |
| 13                         | c.1183-4A>G       | -                 | Intronic | rs10852218     | 30              |
| 14                         | c.1364+26A>G      | -                 | Intronic | rs1800410      | 06              |
| 15                         | c.1365-15C>T      | -                 | Intronic | rs12910433     | 07              |
| 16                         | c.1551C>T         | p.(Cys517Cys)     | Exonic   | rs1800411      | 18              |
| 17                         | c.1636+78T>C      | -                 | Intronic | rs4778218      | 12              |
| 18                         | c.1785-47A>G      | -                 | Intronic | rs7170989      | 09              |
| 19                         | c.1951+45G>A/C    | -                 | Intronic | rs17566952     | 02              |
| 20                         | c.2244+25C>G      | -                 | Intronic | rs7175046      | 13              |
| 21                         | c.2328T>C         | p.(Ala776Ala)     | Exonic   | rs1800419      | 41              |
| 22                         | c.2339G>A         | p.(Gly780Asp)     | Exonic   | rs141949212    | 08              |
| 23                         | c.2338+75T>C      | -                 | Intronic | rs8025804      | 12              |
| 24                         | c.2364G>A         | p.(Ser788Ser)     | Exonic   | rs12592307     | 19              |
| <b>TYRP1 (NM_000550)</b>   |                   |                   |          |                |                 |
| 25                         | c.259C>A          | p.(Arg87Arg)      | Exonic   | rs34509359     | 01              |
| 26                         | c.729T>C          | p.(Ser243Ser)     | Exonic   | rs35866166     | 02              |
| 27                         | c.1589A>G         | p.(Gln530Arg)     | Exonic   | rs41305645     | 01              |
| <b>SLC45A2 (NM_016180)</b> |                   |                   |          |                |                 |
| 28                         | c.814G>A          | p.(Glu272Lys)     | Exonic   | rs26722        | 23              |
| 29                         | c.987A>G          | p.(Thr329Thr)     | Exonic   | rs2287949      | 12              |
| 30                         | c.1122C>G         | p.(Phe374Phe)     | Exonic   | rs16891982     | 11              |
| 31                         | c.1122C>G         | p.(Phe374Leu)     | Exonic   | rs16891982     | 20              |
| 32                         | c.1155T>A         | p.(Ser385Ser)     | Exonic   | -              | 01              |



**Table S3: Prevalence of OCA1 and OCA2 in different populations**

| Population      | Sample size  | % Prevalence |       | Prevalent Alleles                    |                       | Reference     |
|-----------------|--------------|--------------|-------|--------------------------------------|-----------------------|---------------|
|                 |              | OCA1         | OCA2  | TYR                                  | OCA2                  |               |
| <b>Pakistan</b> | 143 families | 37.06        | 31.46 | c.832C>T<br>c.1255G>A                | c.1045-15T>G          | This study; 1 |
| <b>Chinese</b>  | 51 patients  | 76.40        | 11.70 | c.929dupC                            | c.406C>T              | 20            |
|                 | 52 patients  | 50           | 15.40 | c.896G>A                             | NA                    | 21            |
|                 | 127 patients | 70.10        | 10.20 | c.896G>A                             | c.1363A>G             | 22            |
| <b>Indian</b>   | 82 patients  | 59.80        | 10.90 | NA                                   | c.2359G>A             | 23            |
|                 | 23 families  | 17.39        | 8.69  | NA                                   | c.1453G>A             | 24            |
|                 | 14 families  | 100          | NA    | c.832C>T                             | NA                    | 25            |
| <b>American</b> | 36 patients  | 56           | 8     | c.1205G>A                            | NA                    | 26            |
|                 | 121 patients | 69           | 18    | c.1118C>A                            | c.1327G>A             | 26            |
| <b>European</b> | 63 patients  | 46           | 29    | c.1205G>A                            | Exon 3-20<br>deletion | 27            |
| <b>Italian</b>  | 45 patients  | 73.30        | 13.30 | c.1205G>A                            | c.2216T>C             | 28            |
|                 | 279 patients | 57.70        | 17.92 | c.230G>A<br>c.1037-7T>A<br>c.1118C>A | c.913C>T<br>c.1327G>A | 29            |
| <b>African</b>  | 186 families | NA           | 82    | NA                                   | 2.7kb del             | 30            |
|                 | 111 patients | NA           | 77    | NA                                   | 2.7kb del             | 31            |
|                 | 5 families   | NA           | 100   | NA                                   | 2.7kb del             | 32            |
| <b>Japanese</b> | NA           | 34           | <10   | c.929dupC                            | c.1182G>A             | 33,34         |
|                 | 9 families   | 55.50        | NA    | c.929dupC                            | NA                    | 8             |
|                 | 16 patients  | 100          | NA    | c.929dupC                            | NA                    | 35            |
|                 | 26 patients  | 100          | NA    | c.929dupC                            | NA                    | 36            |
| <b>Korean</b>   | 12 patients  | 66.7         | NA    | c.929dupC                            | NA                    | 37            |
|                 | 21 patients  | 66.70        | 5     | c.929dupC                            | NA                    | 38            |
|                 | 12 patients  | 50           | NA    | c.929dupC                            | NA                    | 39            |

NA: Not available

**Table S4: Primers used for the mutational analysis of OCA1-4 genes**

| Gene        | Forward Primer              | Reverse Primer               | Product Size (bp) |
|-------------|-----------------------------|------------------------------|-------------------|
| TYR_ Ex1a   | AGAGAAATCTGTGACTCCAATTAGC   | CATCCAGACAAAGAGGTCATAAATA    | 597               |
| TYR_ Ex1b   | GTGAGAAGAAACATCTTCGATTTG    | CCCTACTCTGACATCGTATATCTAGC   | 500               |
| TYR_ Ex2    | ACAATTTGTTTTAACATGAGGGTGTT  | ACCTCCTAGGACTTTGGATAAGAGA    | 326               |
| TYR_ Ex3    | TCACATAGGTTTTCAGTCATTAAGT   | AAATCCAATGAGCACGTTATTTAT     | 250               |
| TYR_ Ex4    | TGTTTCTTAGTCTGAATAACCTTTTCC | CAGCAATTCTCTGAAAGAAAGTAA     | 248               |
| TYR_ Ex5    | TCGTAACAATGGTGGTAAACAATA    | GGCCCTACTCTATTGCCTAAG        | 300               |
| OCA2_ Ex2   | CTTTCATGAAGAGTGGTTTCTTCT    | CTCATGGAAACCCAATCTGTG        | 345               |
| OCA2_ Ex3   | CATTATTTCTGTGTTGGTGATTCTG   | GTGCAATGCTCAGAAACTCTTACTT    | 196               |
| OCA2_ Ex4   | AGAGATAACCACACCTCTCTTGCTT   | AAAGATGGAGGGGCCATGTA         | 294               |
| OCA2_ Ex5   | ATGCTTTGAGATGGAAGTTACTCAA   | CTATACAGCCAAAGGCACACAG       | 228               |
| OCA2_ Ex6   | CTTACTGCTCTCATACCACACCTCT   | CAAGTGTCTCCTTGTGTTTCAGAT     | 191               |
| OCA2_ Ex7   | CTTGTGGTTCTCCTTGACACTCT     | AAATGAGATTTACAATTCCTTTCA     | 233               |
| OCA2_ Ex8   | GAAACAAATACCTAGACCGAGCAGT   | CCAACACCTCACTCACTGAGAACT     | 199               |
| OCA2_ Ex9   | CTTGTGAACAGTAAGGTCGTTGTTT   | ATCTCAAGCCTCCCTGACTGT        | 248               |
| OCA2_ Ex10  | TGTGGTACACAGTGGCAGATATAGA   | GAATCCTGGAACATCTTTGAGC       | 250               |
| OCA2_ Ex11  | ATTAATTGGCAAATTTGTGCTTTG    | CGCTGTGTCTTTAACATAATGAAGG    | 200               |
| OCA2_ Ex12  | GAGCTCAAATGTGTAAGGGATCAT    | TCAGGATAGAATTATTAATGCAACATC  | 182               |
| OCA2_ Ex13  | TAATGAAAGGCTGCCTCTGTTCTAC   | TTCATGCACCTGAGAATGGAAC       | 298               |
| OCA2_ Ex14  | GGACTACTTTCATTTTCTCCATTT    | AGAGCTCTAACTAAGTGGAGGTGTG    | 233               |
| OCA2_ Ex15  | CCATTTTCATTTCCCTTGTGTTAT    | CCTACATGAGGTTGCACTTGTACT     | 198               |
| OCA2_ Ex16  | TGATATCTGAGGTCATGGGAGAC     | ATGTTCTGCTGCACACCAAG         | 247               |
| OCA2_ Ex17  | GACCAGGGAAGTAATGAGTCTCTTC   | AAAGGCATCACTCACTCTCTTCTT     | 163               |
| OCA2_ Ex18  | GAGTAAATGAGCTGTGGTTTCTCTC   | CAGAATGTGACAAAGCCTATGAAC     | 184               |
| OCA2_ Ex19  | ATCGGTGTGTTAACAGTGGAACTAT   | TTCACCAATAAAACATGAAATACAAA   | 250               |
| OCA2_ Ex20  | GGTTCTAAACTGATTCTCACCACAC   | TAATTAATGGGACCTGTTCTTACCA    | 204               |
| OCA2_ Ex21  | ACTGCAGCTGCTATTGTCCTC       | GGCTATGTCCAGGCTAAAGTTG       | 184               |
| OCA2_ Ex22  | ATTTGGATTTTCTAAATTGGTCACA   | CTAACTGTTGCTTTGGGCTGA        | 250               |
| OCA2_ Ex23  | ATTACAAACCAAGAGAACAGAAGC    | CAGTTTTAACAGAAAATTTAAAGGGAAT | 203               |
| OCA2_ Ex24  | CAGATGCCATAACTCATTTCTCTTT   | AAGTTTTCTTTAGTCTTCGAGCAAT    | 157               |
| TYRP1.Ex2   | GGGCATACCATTTTAAGTACCAAG    | TTGAGTCTCATGCAGGACTTATG      | 579               |
| TYRP1.Ex3   | TGATTATGCTTTTCTCTACCCATC    | AAAATCACTTACAAACAAGGCATCT    | 459               |
| TYRP1.Ex4   | TGTCAGAGAGTAGACCAACAGAAA    | CCTTTCAGGCAACATATTTAATCTC    | 354               |
| TYRP1.Ex5   | TTTAAAGAGCGACAATAAGAACTCC   | ATCTCATTACATAAACACACAGGA     | 361               |
| TYRP1.Ex6   | ATCATTGCTATTACCTGGAAAAGTG   | TGCTCAGCTTGAAGTATAACTATG     | 332               |
| TYRP1.Ex7   | GAATATTGGATGCCTTTAGAACTCA   | AAAGATAACACATTTGCTTTTGGAA    | 292               |
| TYRP1.Ex8   | ATCTGTCCACTTTTGGTGATAACT    | GCATAAGAGAGTAGGGCATTGTTA     | 297               |
| SLC45A2.Ex1 | GTCAAATCCAGTTTGAACACAGAC    | TGCAGAGGTACACACTAAGACACAT    | 524               |
| SLC45A2.Ex2 | ATTACAAAACGCGGATGATTCTAA    | TTAGTGGAAAGTGCCTCATTGTCT     | 300               |
| SLC45A2.Ex3 | GAGTGTCTATGCATGAGGAAAATG    | ACTCTTCTCGTCAAACAGACAAAAC    | 499               |
| SLC45A2.Ex4 | ATACATAACATGCTGTGTGTTCTGG   | ACAGGTGTTAATGGAGGAAATGAT     | 293               |
| SLC45A2.Ex5 | AGAGTGCATGAGAAGGGTTCTTAC    | CCAAGTTGTGCTAGACCAGAAAC      | 250               |
| SLC45A2.Ex6 | TCAGAAGAAAGGATTGTCTGAAATTA  | CTTATTTTCCAGCTCTGCTCTACAC    | 391               |
| SLC45A2.Ex7 | ATTTACTATCTGGCTGGTCACAGAA   | AGAAAATGTTAACTTCTGCCATGT     | 390               |



**Table S5: Primers used for tetra primers ARMS assay**

| Gene                              | Forward Primer                  | Reverse Primer                  | Product Size (bp) |
|-----------------------------------|---------------------------------|---------------------------------|-------------------|
| <i>TYR</i> :<br>c.649C>T          |                                 |                                 |                   |
|                                   | Forward inner primer (C allele) | CCTTGGCATAGACTCTTCTTGTGGC       | 191               |
|                                   | Reverse inner primer (T allele) | GCTTCTGGATTTCTTGTTCCTCAACA      | 129               |
|                                   | Forward outer primer            | ATGTGTCAATGGATGCACTGCTTG        | 270               |
|                                   | Reverse outer primer            | AAGAGGAGAAGAATGATGCTGGGC        |                   |
| <i>TYR</i> :<br>c.832C>T          |                                 |                                 |                   |
|                                   | Forward inner primer (C allele) | GAGGGTGT TTTGTACAGATTGTCTGTATCC | 170               |
|                                   | Reverse inner primer (T allele) | TGATGGCTGTTGTA CTCTCCAAGCA      | 100               |
|                                   | Forward outer primer            | CGATAATTAGGAGTTCCAACATTTCTGCC   | 269               |
|                                   | Reverse outer primer            | TTATCCATGGAACCAGATTCATATTGGG    |                   |
| <i>OCA2</i> :<br>c.1045-15<br>T>G |                                 |                                 |                   |
|                                   | Forward inner primer (G allele) | ACTGGAACGCGGTAATTTTCG           | 204               |
|                                   | Reverse inner primer (T allele) | ACGATCTGGAAAGAAGCGCA            | 298               |
|                                   | Forward outer primer            | GACAGTTTGCTATGGCCTTTCTCA        | 461               |
|                                   | Reverse outer primer            | ATAGTGAAAAAACCAGCGAAAGCC        |                   |
| <i>OCA2</i> :<br>c.1456G>T        |                                 |                                 |                   |
|                                   | Forward inner primer (T allele) | AGCTGCCACTGCCATCGAGT            | 192               |
|                                   | Reverse inner primer (G allele) | TGGAAACAATAATGACATTTGGAGGATC    | 137               |
|                                   | Forward outer primer            | TTCCTCCATTTGTGACAGGTTGTG        | 281               |
|                                   | Reverse outer primer            | GCACTTACTGTGAAGAGGTGGCGT        |                   |
| <i>OCA2</i> :<br>c.2228C>T        |                                 |                                 |                   |
|                                   | Forward inner primer (C allele) | GCGTCGTCCCTGATTGACAACATACC      | 168               |
|                                   | Reverse inner primer (T allele) | GCAACTCACCATGGTAGCAGTGACCA      | 250               |
|                                   | Forward outer primer            | GCTTGCACACCTATGTCTGCCTTGGT      | 378               |
|                                   | Reverse outer primer            | TTCGTCTCTACACCTGTGAGTGCAGC      |                   |
| <i>SLC45A2</i> :<br>c.1532C>T     |                                 |                                 |                   |
|                                   | Forward inner primer (T allele) | GACCGTTGTCGTGCTGGTGATCACCGT     | 185               |
|                                   | Reverse inner primer (C allele) | AACAGCCTATCAGTGCCACCGCAGCCG     | 140               |
|                                   | Forward outer primer            | CCACCCTCACATGCATGGTGCAGCTG      | 272               |
|                                   | Reverse outer primer            | AGTGGGCGTCCAATGGGCAGACCCTAAG    |                   |

## Supplementary References

- 1 Jaworek, T. J. *et al.* Molecular genetic studies and delineation of the oculocutaneous albinism phenotype in the Pakistani population. *Orphanet J Rare Dis* **7**, 44, doi:10.1186/1750-1172-7-44 (2012).
- 2 Shah, S. A. *et al.* Mutational spectrum of the TYR and SLC45A2 genes in Pakistani families with oculocutaneous albinism, and potential founder effect of missense substitution (p.Arg77Gln) of tyrosinase. *Clin Exp Dermatol* **40**, 774-780, doi:10.1111/ced.12612 (2015).
- 3 Oetting, W. S., Fryer, J. P. & King, R. A. A dinucleotide deletion (-delta GA115) in the tyrosinase gene responsible for type I-A (tyrosinase negative) oculocutaneous albinism in a Pakistani individual. *Hum Mol Genet* **2**, 1047-1048 (1993).
- 4 Shah, S. A. *et al.* Identification of a novel mutation (p.Ile198Thr) in gene TYR in a Pakistani family with nonsyndromic oculocutaneous albinism. *Clin Exp Dermatol* **39**, 646-648, doi:10.1111/ced.12382 (2014).
- 5 Tripathi, R. K., Strunk, K. M., Giebel, L. B., Weleber, R. G. & Spritz, R. A. Tyrosinase gene mutations in type I (tyrosinase-deficient) oculocutaneous albinism define two clusters of missense substitutions. *Am J Med Genet* **43**, 865-871, doi:10.1002/ajmg.1320430523 (1992).
- 6 Tripathi, R. K. *et al.* Mutations of the tyrosinase gene in Indo-Pakistani patients with type I (tyrosinase-deficient) oculocutaneous albinism (OCA). *Am J Hum Genet* **53**, 1173-1179 (1993).
- 7 King, R. A. *et al.* Tyrosinase gene mutations in oculocutaneous albinism 1 (OCA1): definition of the phenotype. *Hum Genet* **113**, 502-513, doi:10.1007/s00439-003-0998-1 (2003).
- 8 Goto, M. *et al.* Tyrosinase gene analysis in Japanese patients with oculocutaneous albinism. *J Dermatol Sci* **35**, 215-220, doi:10.1016/j.jdermsci.2004.06.007 (2004).
- 9 Spritz, R. A., Strunk, K. M., Giebel, L. B. & King, R. A. Detection of mutations in the tyrosinase gene in a patient with type IA oculocutaneous albinism. *N Engl J Med* **322**, 1724-1728, doi:10.1056/NEJM199006143222407 (1990).
- 10 Spritz, R. A. Molecular genetics of oculocutaneous albinism. *Semin Dermatol* **12**, 167-172 (1993).
- 11 Giebel, L. B. *et al.* Tyrosinase gene mutations associated with type IB ("yellow") oculocutaneous albinism. *Am J Hum Genet* **48**, 1159-1167 (1991).
- 12 King, R. A., Mentink, M. M. & Oetting, W. S. Non-random distribution of missense mutations within the human tyrosinase gene in type I (tyrosinase-related) oculocutaneous albinism. *Mol Biol Med* **8**, 19-29 (1991).
- 13 Oetting, W. S. & King, R. A. Molecular analysis of type I-A (tyrosinase negative) oculocutaneous albinism. *Hum Genet* **90**, 258-262 (1992).
- 14 Spritz, R. A., Fukai, K., Holmes, S. A. & Luande, J. Frequent intragenic deletion of the P gene in Tanzanian patients with type II oculocutaneous albinism (OCA2). *Am J Hum Genet* **56**, 1320-1323 (1995).
- 15 Lee, S. T. *et al.* Mutations of the P gene in oculocutaneous albinism, ocular albinism, and Prader-Willi syndrome plus albinism. *N Engl J Med* **330**, 529-534, doi:10.1056/NEJM199402243300803 (1994).

- 16 Oetting, W. S. *et al.* Mutations of the human P gene associated with Type II oculocutaneous albinism (OCA2). Mutations in brief no. 205. Online. *Hum Mutat* **12**, 434, doi:10.1002/(SICI)1098-1004(1998)12:6<434::AID-HUMU16>3.0.CO;2-7 (1998).
- 17 Kausar, T. *et al.* Genetic studies of TYRP1 and SLC45A2 in Pakistani patients with nonsyndromic oculocutaneous albinism. *J Invest Dermatol* **133**, 1099-1102, doi:10.1038/jid.2012.432 (2013).
- 18 Rooryck, C., Roudaut, C., Robine, E., Musebeck, J. & Arveiler, B. Oculocutaneous albinism with TYRP1 gene mutations in a Caucasian patient. *Pigment Cell Res* **19**, 239-242, doi:10.1111/j.1600-0749.2006.00298.x (2006).
- 19 Forsheew, T. *et al.* Identification of novel TYR and TYRP1 mutations in oculocutaneous albinism. *Clin Genet* **68**, 182-184, doi:10.1111/j.1399-0004.2005.00460.x (2005).
- 20 Wei, A. H., Zang, D. J., Zhang, Z., Yang, X. M. & Li, W. Prenatal genotyping of four common oculocutaneous albinism genes in 51 Chinese families. *J Genet Genomics* **42**, 279-286, doi:10.1016/j.jgg.2015.05.001 (2015).
- 21 Wei, A., Yang, X., Lian, S. & Li, W. Implementation of an optimized strategy for genetic testing of the Chinese patients with oculocutaneous albinism. *J Dermatol Sci* **62**, 124-127, doi:10.1016/j.jdermsci.2011.02.009 (2011).
- 22 Wei, A. *et al.* A comprehensive analysis reveals mutational spectra and common alleles in Chinese patients with oculocutaneous albinism. *J Invest Dermatol* **130**, 716-724, doi:10.1038/jid.2009.339 (2010).
- 23 Sengupta, M. *et al.* Comprehensive analysis of the molecular basis of oculocutaneous albinism in Indian patients lacking a mutation in the tyrosinase gene. *Br J Dermatol* **163**, 487-494, doi:10.1111/j.1365-2133.2010.09830.x (2010).
- 24 Renugadevi, K., Sil, A. K., Perumalsamy, V. & Sundaresan, P. Spectrum of candidate gene mutations associated with Indian familial oculocutaneous and ocular albinism. *Mol Vis* **16**, 1514-1524 (2010).
- 25 Chaki, M. *et al.* Higher prevalence of OCA1 in an ethnic group of eastern India is due to a founder mutation in the tyrosinase gene. *Mol Vis* **11**, 531-534 (2005).
- 26 Hutton, S. M. & Spritz, R. A. Comprehensive analysis of oculocutaneous albinism among non-Hispanic caucasians shows that OCA1 is the most prevalent OCA type. *J Invest Dermatol* **128**, 2442-2450, doi:10.1038/jid.2008.109 (2008).
- 27 Rooryck, C. *et al.* Molecular diagnosis of oculocutaneous albinism: new mutations in the OCA1-4 genes and practical aspects. *Pigment Cell Melanoma Res* **21**, 583-587, doi:10.1111/j.1755-148X.2008.00496.x (2008).
- 28 Gargiulo, A. *et al.* Molecular and clinical characterization of albinism in a large cohort of Italian patients. *Invest Ophthalmol Vis Sci* **52**, 1281-1289, doi:10.1167/iovs.10-6091 (2011).
- 29 Mauri, L. *et al.* Clinical evaluation and molecular screening of a large consecutive series of albino patients. *J Hum Genet*, doi:10.1038/jhg.2016.123 (2016).
- 30 Puri, N. *et al.* Type 2 oculocutaneous albinism (OCA2) in Zimbabwe and Cameroon: distribution of the 2.7-kb deletion allele of the P gene. *Hum Genet* **100**, 651-656 (1997).

- 31 Stevens, G., Ramsay, M. & Jenkins, T. Oculocutaneous albinism (OCA2) in sub-Saharan Africa: distribution of the common 2.7-kb P gene deletion mutation. *Hum Genet* **99**, 523-527 (1997).
- 32 Lund, P. M., Puri, N., Durham-Pierre, D., King, R. A. & Brilliant, M. H. Oculocutaneous albinism in an isolated Tonga community in Zimbabwe. *J Med Genet* **34**, 733-735 (1997).
- 33 Suzuki, T. & Tomita, Y. Recent advances in genetic analyses of oculocutaneous albinism types 2 and 4. *J Dermatol Sci* **51**, 1-9, doi:10.1016/j.jdermsci.2007.12.008 (2008).
- 34 Suzuki, T. *et al.* Six novel P gene mutations and oculocutaneous albinism type 2 frequency in Japanese albino patients. *J Invest Dermatol* **120**, 781-783, doi:10.1046/j.1523-1747.2003.12127.x (2003).
- 35 Tanita, M. *et al.* Polymorphic sequences of the tyrosinase gene: allele analysis on 16 OCA1 patients in Japan indicate that three polymorphic sequences in the tyrosinase gene promoter could be powerful markers for indirect gene diagnosis. *J Hum Genet* **47**, 1-6, doi:10.1007/s10038-002-8648-3 (2002).
- 36 Tomita, Y., Miyamura, Y., Kono, M., Nakamura, R. & Matsunaga, J. Molecular bases of congenital hypopigmentary disorders in humans and oculocutaneous albinism 1 in Japan. *Pigment Cell Res* **13 Suppl 8**, 130-134 (2000).
- 37 Ko, J. M., Yang, J. A., Jeong, S. Y. & Kim, H. J. Mutation spectrum of the TYR and SLC45A2 genes in patients with oculocutaneous albinism. *Mol Med Rep* **5**, 943-948, doi:10.3892/mmr.2012.764 (2012).
- 38 Park, S. H., Chae, H., Kim, Y. & Kim, M. Molecular analysis of Korean patients with oculocutaneous albinism. *Jpn J Ophthalmol* **56**, 98-103, doi:10.1007/s10384-011-0098-z (2012).
- 39 Park, S. K. *et al.* Prevalent and novel mutations of the tyrosinase gene in Korean patients with tyrosinase-deficient oculocutaneous albinism. *Mol Cells* **7**, 187-191 (1997).
